# Supplementary material for: Prevalence of gestational diabetes mellitus and associated factors among women attending antenatal care at Gondar town public health facilities, Northwest Ethiopia
Source: Springer Nature journal article supplement (doi:10.1186/s12884-019-2492-3), 2019-09-13
Supplement: MOESM1 [file 17170274]

## Consent form for participation in research

### Greetings.

Dear participant!

Hello! My name is \_\_\_\_\_, I am here on behalf of **Mr. Achenef Asmamaw Muche**, a PhD student at Pan African University Life and Earth Sciences Institute, University of Ibadan, Ibadan, Nigeria. He is conducting a research for the partial fulfilment of Ph.D degree in Reproductive Health Science. This study obtained ethical approval from the institutional review board of University of Ibadan/University College Hospital and University of Gondar. He has also received permission from the Amhara public health institute and the health authorities of the study sites to conduct the study.

You are kindly requested to be included in the study, which will have importance in improving maternal and child health services. Identifying women with gestational diabetes mellitus provides an opportunity to improve pregnancy outcomes and women to make changes in their lifestyle to help prevent the development of diabetes later in life. I am asking you to participate in this study voluntarily. You are requested to give full history taking, clinical examinations, permitted some information retrieved from ANC cards, and also requested to come fasting on your appointment to give a blood sample for laboratory investigation (2h-75 g OGTT) with the standard care for screening and/or diagnosis of GDM used for this research project. If you are diagnosed with GDM immediately you will be linked (referred) to health providers and get possible treatment options in the respective public health facilities. No information concerning you, as an individual will be passed to another individual or institution without your agreement. Your participation is voluntary and you have the right not to participate fully or partially. Moreover, you are allowed to ask questions and have received adequate clarification in a language you understand. If you agree to be included in the study, you are requested to confirm this with your signature below.

**May I continue?** Yes-----1 No----2

Having been well explained and informed of the intentions and benefits of the study, I voluntary to participate in the study.

Code of the participant: \_\_\_\_\_

Participant's signature: \_\_\_\_\_ date \_\_\_\_\_

Name of data collector: \_\_\_\_\_ signature \_\_\_\_\_ date \_\_\_\_\_

Name of supervisor: \_\_\_\_\_ signature \_\_\_\_\_ date \_\_\_\_\_

**A questionnaire prepared to assess the prevalence of gestational diabetes mellitus and associated factors among women attending antenatal care at Gondar town public health facilities, Northwest Ethiopia.**

| Date of interview: -----                                                               |                                             |                                                                                                                                   |      |
|----------------------------------------------------------------------------------------|---------------------------------------------|-----------------------------------------------------------------------------------------------------------------------------------|------|
| Health facility name:-----                                                             |                                             |                                                                                                                                   |      |
| Code of the mother: -----                                                              |                                             |                                                                                                                                   |      |
| Address of the mother: -----                                                           |                                             |                                                                                                                                   |      |
| Name of data collector: -----                                                          |                                             |                                                                                                                                   |      |
| Date of appointment for next visit :-----                                              |                                             |                                                                                                                                   |      |
| <b>Section 1: Socio-demographic characteristics</b>                                    |                                             |                                                                                                                                   |      |
| Now, I would like to ask you the Socio-demographic characteristics of about your self. |                                             |                                                                                                                                   |      |
| No.                                                                                    | Questions                                   | Responses (alternative choices)                                                                                                   | Code |
| 101                                                                                    | How old were you at your last birthday?     | 1-----Years    2. Unknown                                                                                                         |      |
| 102                                                                                    | What is your place of residence             | 1. Urban    2. Rural                                                                                                              |      |
| 103                                                                                    | What is your religion?                      | 1. Orthodox<br>2. Muslim<br>3. Protestant<br>4. Catholic<br>5. Other (specify)-----                                               |      |
| 104                                                                                    | What is your ethnic group?                  | 1. Amhara<br>2. Oromo<br>3. Tigrie<br>4. Other (specify -----                                                                     |      |
| 105                                                                                    | What is your current marital status?        | 1. Single<br>2. Married<br>3. Divorced<br>4. Widowed<br>5. Separated                                                              |      |
| 106                                                                                    | What level of schooling have you completed? | 1. Not read and write<br>2. Read and write<br>3. Grade1-8<br>4. Grade 9-12<br>5. Certificate<br>6. Diploma<br>7. Degree and above |      |
| 107                                                                                    | What is your main occupation?               | 1. Housewife<br>2. Farmer<br>3. Government Employee<br>4. Private employee                                                        |      |

|                                                                                                      |                                                                               | 5. Merchant<br>6. Daily laborer<br>7. Student<br>8. Other (Specify)-----                |      |
|------------------------------------------------------------------------------------------------------|-------------------------------------------------------------------------------|-----------------------------------------------------------------------------------------|------|
| 108                                                                                                  | How many children do you have?                                                | ----- children                                                                          |      |
| 109                                                                                                  | What is the amount your monthly income?                                       | ----- Eth birr                                                                          |      |
| <b>Section 2. Current pregnancy and obstetric history</b>                                            |                                                                               |                                                                                         |      |
| Now, I would like to ask you about the pregnancy and obstetric history that you have had currently.  |                                                                               |                                                                                         |      |
| No.                                                                                                  | Questions                                                                     | Responses (alternative choices)                                                         | Code |
| 201                                                                                                  | Gestational age (wks) by                                                      | i.LMP-----GA----weeks+--days<br>ii.by ultrasound (if available)<br>GA----weeks+----days |      |
| 202                                                                                                  | For how many times have you been live birth (parity)                          | -----                                                                                   |      |
| 203                                                                                                  | Including this pregnancy, for how many times have you been pregnant (gravida) | -----                                                                                   |      |
| 204                                                                                                  | What was your weight during the first ANC visit (kg)                          | 1. ----- Kg      2. Unknown                                                             |      |
| 205                                                                                                  | Weight before conception (kg)                                                 | 1. ----- Kg      2. Unknown                                                             |      |
| 206                                                                                                  | Have you had high blood pressure (hypertension)?                              | 1. Yes      2. No                                                                       |      |
| <b>Section 3. Prior pregnancy and obstetric history</b>                                              |                                                                               |                                                                                         |      |
| Now, I would like to ask you about the pregnancy and obstetric history that you have had previously. |                                                                               |                                                                                         |      |
| No.                                                                                                  | Questions                                                                     | Responses (alternative choices)                                                         | Code |
| 301                                                                                                  | Birth weight of the new born (the most recent newborn)                        | -----Kg                                                                                 |      |
| 302                                                                                                  | Have you ever given birth to large size (macrosomic) baby?                    | 1. Yes      2. No                                                                       |      |
| 303                                                                                                  | Have you ever given birth to preterm?                                         | 1. Yes      2. No                                                                       |      |
| 304                                                                                                  | Have you ever had a baby by cesarean delivery?                                | 1. Yes      2. No                                                                       |      |
| 305                                                                                                  | Have you had abortions and/ miscarriages?                                     | 1. Yes      2. No                                                                       |      |
| 306                                                                                                  | Have you had Still birth?                                                     | 1. Yes      2. No                                                                       |      |
| 307                                                                                                  | Have you delivered a baby with congenital abnormality?                        | 1. Yes      2. No                                                                       |      |
| <b>Section 4. General medical history (personal and family) and behaviour</b>                        |                                                                               |                                                                                         |      |
| Now, I would like to ask you about the general medical history that you have had in your life.       |                                                                               |                                                                                         |      |
| No.                                                                                                  | Questions                                                                     | Responses (alternative choices)                                                         | Code |
| <b>A. Personal history of diseases</b>                                                               |                                                                               |                                                                                         |      |
| 401                                                                                                  | Previous history of GDM                                                       | 1. Yes      2. No                                                                       |      |
| 402                                                                                                  | History of high blood pressure                                                | 1. Yes      2. No                                                                       |      |
| <b>B. Family history of diseases</b>                                                                 |                                                                               |                                                                                         |      |

|                         |                                                                                              |                                                                                                            |  |
|-------------------------|----------------------------------------------------------------------------------------------|------------------------------------------------------------------------------------------------------------|--|
| 403                     | Diabetes melitus                                                                             | 1. Yes      2. No                                                                                          |  |
| 404                     | High blood pressure                                                                          | 1. Yes      2. No                                                                                          |  |
| <b>C. Substance use</b> |                                                                                              |                                                                                                            |  |
| 405                     | Have you ever taken any type of alcoholic drink? (Beer, wine, spirit, 'palm wine, otika etc) | 1. Daily<br>2. Occasionally<br>3. Stopped after conception<br>4. Stopped before conception<br>5. No at all |  |
| 406                     | Have you ever taken cofee drink?                                                             | 1. Daily<br>2. Occasionally<br>3. Stopped after conception<br>4. Stopped before conception<br>5. No at all |  |

**Section 5. Assessment of Minimum Dietary Diversity for Women (MDD-W)**

The next question focuses the ten women dietary diversity or varieties of foods from the lists of food with one type or conjugates within 24 hours from yesterday 12:00 to today 12:00 o'clock.

| <b>No.</b> | <b>Food group</b>                          | <b>Examples</b>                                                                                                                                                                                                                                                                                                  | <b>Consumed<br/>Yes=1<br/>No=0</b> |  |
|------------|--------------------------------------------|------------------------------------------------------------------------------------------------------------------------------------------------------------------------------------------------------------------------------------------------------------------------------------------------------------------|------------------------------------|--|
| 501        | Grains/cereals , roots & tubers            | Bread, pasta, rice, biscuit, cookies or dried food made from oats, maize, barley, wheat, millet, sorghum, and others. Any food made from teff (injera, pencake, porridge) cerifam, faffa (pre-processed baby foods) and other packed baby foods: Potatoe, boina/cassava, buila, kocho, beetroot, and other roots |                                    |  |
| 502        | Pulses                                     | Bean, pea, lentil                                                                                                                                                                                                                                                                                                |                                    |  |
| 503        | nuts and seeds                             | Sesame, flax, sunflower, and nuts                                                                                                                                                                                                                                                                                |                                    |  |
| 504        | Dairy                                      | Milk, cheese, yogurt or other milk products                                                                                                                                                                                                                                                                      |                                    |  |
| 505        | Meat, poultry and fish                     | Beef, lamb, goat, chicken, fish                                                                                                                                                                                                                                                                                  |                                    |  |
| 506        | Eggs                                       | Egg                                                                                                                                                                                                                                                                                                              |                                    |  |
| 507        | Dark green leafy vegetables                | Kale/gomen, spinach, kosta, green pepper                                                                                                                                                                                                                                                                         |                                    |  |
| 508        | Other vitamin A rich fruits and vegetables | Pumpkin, carrot, papaya, mango, sweet potato                                                                                                                                                                                                                                                                     |                                    |  |
| 509        | Other vegetables                           | cucumber, tomato , Green pepper, Mushroom, Zucchini, Onion                                                                                                                                                                                                                                                       |                                    |  |
| 510        | Other fruits                               | Orange, banana, Apple, Avocado, Guava, Lemon                                                                                                                                                                                                                                                                     |                                    |  |
|            | <b>Total score</b>                         |                                                                                                                                                                                                                                                                                                                  |                                    |  |

**Section 6. Assessment of physical activities**  
**International Physical activity Questionnaire**

We are interested in finding out about the kind of physical activities that women do as part of their every day lives. The questions will ask you about the time you spent being physically active in the last 7 days. Please answer each question even if you do not consider yourself be an active person. Please think about the activities you do at work, as part of your house and yard work, to get place to place, and in your spare time for recreation, exercise or sport. Now, I would like to ask you about the physical Activity in the past (1) week including today.

In the past seven days

| No.                                                                                                                                                                                                                                                                                                                            | Questions                                                                                                                                                                                          | Responses (alternative choices)                                            | Skip                     |
|--------------------------------------------------------------------------------------------------------------------------------------------------------------------------------------------------------------------------------------------------------------------------------------------------------------------------------|----------------------------------------------------------------------------------------------------------------------------------------------------------------------------------------------------|----------------------------------------------------------------------------|--------------------------|
| Think about all the <b>vigorous</b> activities that you did in the <b>last 7 days</b> . <b>Vigorous</b> physical activities refer to activities that take hard physical effort and make you breathe much harder than normal. Think <i>only</i> about those physical activities that you did for at least 10 minutes at a time. |                                                                                                                                                                                                    |                                                                            |                          |
| 601                                                                                                                                                                                                                                                                                                                            | During the <b>last 7 days</b> , on how many days did you do <b>vigorous</b> physical activities like heavy lifting, digging, aerobics, or fast bicycling?                                          | 1. ____ days per week<br>2. No vigorous physical activities                | If No, Skip Q <b>603</b> |
| 602                                                                                                                                                                                                                                                                                                                            | How much time did you usually spend doing <b>vigorous</b> physical activities on one of those days?                                                                                                | 1. ____ hours per day<br>2. ____ minutes per day<br>3. Don't know/Not sure |                          |
| Think about all the <b>moderate</b> activities that you did in the <b>last 7 days</b> . <b>Moderate</b> activities refer to activities that take moderate physical effort and make you breathe somewhat harder than normal. Think <i>only</i> about those physical activities that you did for at least 10 minutes at a time.  |                                                                                                                                                                                                    |                                                                            |                          |
| 603                                                                                                                                                                                                                                                                                                                            | During the <b>last 7 days</b> , on how many days did you do <b>moderate</b> physical activities like carrying light loads, bicycling at a regular pace, or doubles tennis? Do not include walking. | 1. ____ days per week<br>2. No moderate physical activities                | If No, Skip Q <b>605</b> |
| 604                                                                                                                                                                                                                                                                                                                            | How much time did you usually spend doing <b>moderate</b> physical activities on one of those days?                                                                                                | 1. ____ hours per day<br>2. ____ minutes per day<br>3. Don't know/Not sure |                          |
| Think about the time you spent <b>walking</b> in the <b>last 7 days</b> . This includes at work and at home, walking to travel from place to place, and any other walking that you might do solely for recreation, sport, exercise, or leisure.                                                                                |                                                                                                                                                                                                    |                                                                            |                          |
| 605                                                                                                                                                                                                                                                                                                                            | During the <b>last 7 days</b> , on how many days did you <b>walk</b> for at least 10 minutes at a time?                                                                                            | 1. ____ days per week<br>2. No walking                                     | If No, Skip Q <b>607</b> |
| 606                                                                                                                                                                                                                                                                                                                            | How much time did you usually spend <b>walking</b> on one of those days?                                                                                                                           | 1. ____ hours per day<br>2. ____ minutes per day<br>3. Don't know/Not sure |                          |
| The last question is about the time you spent <b>sitting</b> on weekdays during the <b>last 7 days</b> . Include time spent at work, at home, while doing course work and during leisure time. This may include time spent sitting at a desk, visiting friends, reading, or sitting or lying down to watch television          |                                                                                                                                                                                                    |                                                                            |                          |
| 607                                                                                                                                                                                                                                                                                                                            | During the <b>last 7 days</b> , how much time did you spend <b>sitting</b> on a <b>week day</b> ?                                                                                                  | 1. ____ hours per day<br>2. ____ minutes per day<br>3. Don't know/Not sure |                          |

**Section 7. Assessment of Antenatal Depression**

**Feelings of depression (EPDS).** Tell us the way you have been feeling in the past (1) week including today.

In the past seven days,

| No. | Questions                                                                         | Response                                                                                                    | Score            |
|-----|-----------------------------------------------------------------------------------|-------------------------------------------------------------------------------------------------------------|------------------|
| 701 | In the last week, have you been able to laugh and see the funny side of things?   | As much as I always used to<br>Not as much as I used to<br>Certainly not as much as I used to<br>Not at all | 0<br>1<br>2<br>3 |
| 702 | In the last week, have you looked forward with enjoyment to things?               | As much as I always used to<br>Rather less<br>Certainly less<br>Never looked forward                        | 0<br>1<br>2<br>3 |
| 703 | In the last week, have you blamed yourself unnecessarily when things went wrong?  | Most of the time<br>Sometimes<br>Rarely<br>Never                                                            | 3<br>2<br>1<br>0 |
| 704 | In the last week, have you been anxious or worried for no good reason?            | Most of the time<br>Sometimes<br>Not often<br>Never                                                         | 0<br>1<br>2<br>3 |
| 705 | In the last week, have you felt scared or panicky for no good reason?             | Most of the time<br>Sometimes<br>Rarely<br>Never                                                            | 3<br>2<br>1<br>0 |
| 706 | In the last week, have things been getting on top of you?                         | Most of the time unable to cope<br>Sometimes unable<br>Mostly able<br>Coping as usual                       | 3<br>2<br>1<br>0 |
| 707 | In the last week, have you been so unhappy that you have had difficulty sleeping? | Most of the time<br>Sometimes<br>Rarely<br>Never                                                            | 3<br>2<br>1<br>0 |
| 708 | In the last week, have you felt sad or miserable?                                 | Most of the time<br>Sometimes<br>Occasionally<br>Never                                                      | 3<br>2<br>1<br>0 |
| 709 | In the last week, have you felt so unhappy that you have been crying?             | Most of the time<br>Sometimes<br>Occasionally<br>Never                                                      | 3<br>2<br>1<br>0 |
| 710 | In the last week, has the thought of harming yourself occurred to you?            | Frequently<br>Sometimes<br>Not often<br>Never                                                               | 3<br>2<br>1<br>0 |
|     | <b>Total score</b>                                                                |                                                                                                             |                  |

**Section 8. Anthropometric and clinical assessments**

|     |                                       |                                                                             |
|-----|---------------------------------------|-----------------------------------------------------------------------------|
| 801 | Current weight (kg)                   | -----Kg                                                                     |
| 802 | Height                                | -----Cm                                                                     |
| 803 | Body mass index                       | ----- kg/m <sup>2</sup>                                                     |
| 804 | MUAC                                  | -----Cm                                                                     |
| 805 | Glucose in the urine                  |                                                                             |
| 806 | Hemoglobin level (mg/dl)              | -----mg/dl                                                                  |
| 807 | Blood pressure (systolic /diastolic ) | Systolic blood pressure (mmHg)-----<br>Diastolic blood pressure (mmHg)----- |

**808. Blood glucose test**

| Gestationl age | Intial visit (20-23 <sup>+6</sup> weeks ) | Regualr OGTT (24-28 weeks)                        | Late OGTT (32-36 weeks)                           |
|----------------|-------------------------------------------|---------------------------------------------------|---------------------------------------------------|
| Result         | FPG ----- mg/dl<br>RPG ----- mg/dl        | FPG ----- mg/dl<br>1hr-----mg/dl<br>2hr-----mg/dl | FPG ----- mg/dl<br>1hr-----mg/dl<br>2hr-----mg/dl |

**Comments:**

-----  
 -----  
 -----  
 -----

**Thank you for your participation!**
